# Supplementary material
Source: HighWire-hosted journal article supplement (https://www.jneurosci.org/highwire/filestream/597625/field_highwire_adjunct_files/1/Supplemental_material_2_Fig._S5.pdf)
Supplement: Supplemental_material_2_Fig._S5.pdf [file Supplemental_material_2_Fig._S5.pdf]

SUPPLEMENTAL MATERIAL 2, Fig S5

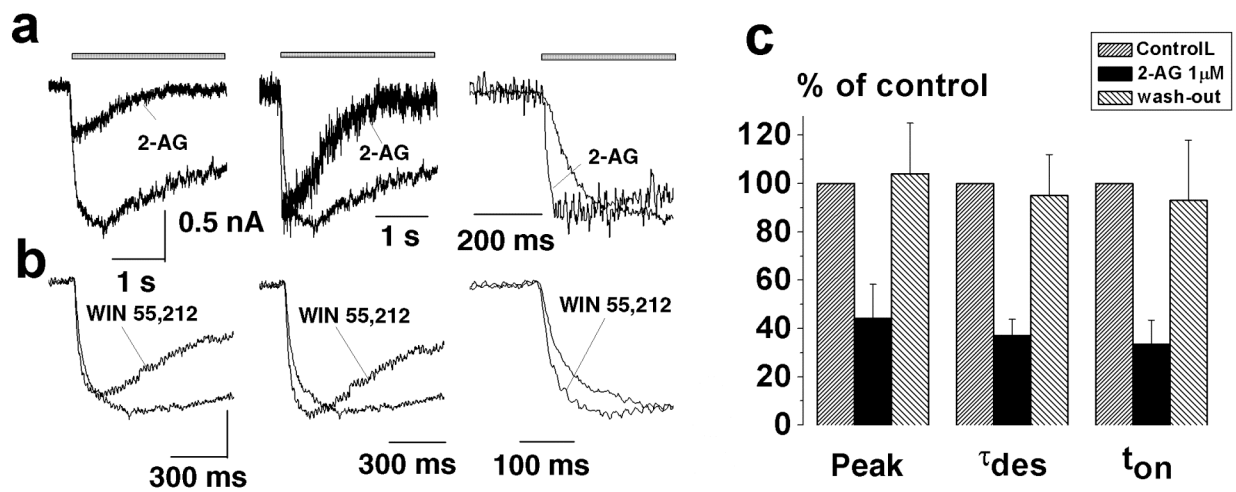

**Figure S5.** Modulation of  $I_{Gly}$  by endogenous and synthetic cannabinoids in isolated Purkinje neurons. *Left:* representative traces of  $I_{Gly}$  induced by 100  $\mu M$  of Gly in control and on the top of 2-AG (1  $\mu M$ ) (a) and WIN 55,212-2 (1  $\mu M$ ) (b). *Middle and right:* corresponding traces normalized to the peak amplitude. (c)- statistics for the 2-AG – induced changes of the  $I_{Gly}$  peak amplitude,  $\tau_{des}$  and  $t_{on}$  at holding voltages of -100 mV.
